# Supplementary material
Source: publisher site journal article supplement (https://www.dovepress.com/article/404476)
Supplement: Supplementary file 1 [file get_supplementary_file.php]

**Table S1. Univariate analysis showing factors associated with maternal satisfaction with antenatal care in public health centers.**

***General facility satisfaction***

|  | **General Satisfaction** | |
| --- | --- | --- |
| **Satisfaction with operating hours** | **Satisfaction with cleanliness** |
| OR (95% CI) | OR (95% CI) |
| **Age** | 0.96 (0.90 - 1.02) | 1.02 (0.98 - 1.05) |
| **Women's occupation** |  |  |
| Not working | Ref | Ref |
| Working | 5.26 (1.21 - 22.81) | 0.91 (0.60 - 1.37) |
| **Women's Education** |  |  |
| Illiterate | Ref | Ref |
| Literate | 0.85 (0.35 - 2.11) | 0.52 (0.34 - 0.78) |
| **Parity** |  |  |
| Multi Parous | Ref | Ref |
| Primary Parous | 1.97 (0.57 - 6.78) | 1.02 (0.64 - 1.62) |

***Article 2 - Right to information***

|  | **Right to Information** | | | | |
| --- | --- | --- | --- | --- | --- |
| **Satisfaction with understanding the need for examination** | **Permission for procedures (took consent)** | **Satisfaction with birth preparedness counselling** | **Satisfaction with healthy pregnancy counselling** | **Satisfaction with nutrition counselling** |
| OR (95% CI) | OR (95% CI) | OR (95% CI) | OR (95% CI) | OR (95% CI) |
| Age | 1.01 (0.99 - 1.03) | 1.01 (0.99 - 1.03) | 1.01 (0.98 - 1.04) | 0.98 (0.96 - 1.00) * | 0.99 (0.97 - 1.01) |
| Women's occupation |  |  |  |  |  |
| Not working | Ref | Ref | Ref | Ref | Ref |
| Working | 0.76 (0.58 - 0.99) | 0.58 (0.44 - 0.76) | 0.73 (0.48 - 1.11) ** | 3.01(2.09 - 4.32) * | 0.57 (0.43 - 0.75) |
| Women's Education |  |  |  |  |  |
| Illiterate | Ref | Ref | Ref | Ref | Ref |
| Literate | 1.69 (1.28 - 2.22) | 1.08 (0.82 - 1.42) | 1.31 (0.89 - 1.94) ** | 1.02 (0.74 - 1.39) | 1.57 (1.19 - 2.06) |
| Parity |  |  |  |  |  |
| Multi Parous | Ref | Ref | Ref | Ref | Ref |
| Primary Parous | 0.79 (0.59 - 1.07) | 1.17 (0.86 - 1.59) | 0.98 (0.63 - 1.53) | 1.48 (1.03 - 2.13) * | 0.87 (0.64 - 1.18) |

***Article 3 - Privacy and confidentiality***

|  | **Satisfaction with Privacy and Confidentiality** |
| --- | --- |
| **Covered by a cloth during the exam** |
| OR (95% CI) |
| **Age** | 0.95 (0.88 – 1.04) |
| **Women's occupation** |  |
| Not working | Ref |
| Working | 1.71 (0.46 – 6.39) |
| **Women's Education** |  |
| Illiterate | Ref |
| Literate | 0.56 (0.18 – 1.77) |
| **Parity** |  |
| Multi Parous | Ref |
| Primary Parous | 1.72 (0.38 – 7.94) |

***Article 4 - Dignity and respect***

|  | **Dignity and Respect** | |
| --- | --- | --- |
| **Choosing not to take action despite feeling disrespected** | **Satisfaction with handling misconduct or disrespect** |
| OR (95% CI) | OR (95% CI) |
| **Age** | 1.01 (0.99 - 1.03) | 1.04 (1.01 - 1.06) |
| **Women's occupation** |  |  |
| Not working | Ref | Ref |
| Working | 0.56 (0.43 - 0.74) | 0.18 (0.11 - 0.29) |
| **Women's Education** |  |  |
| Illiterate | Ref | Ref |
| Literate | 1.25 (0.94 - 1.64) | 0.81 (0.57 - 1.15) |
| **Parity** |  |  |
| Multi Parous | Ref | Ref |
| Primary Parous | 0.82 (0.60 - 1.11) | 0.70 (0.47 - 1.04) |

***Article 5 - Equitable care***

|  | **Satisfaction with Equitable care** | |
| --- | --- | --- |
| **Treated differently** | **Language** |
| OR (95% CI) | OR (95% CI) |
| **Age** | 0.98 (0.92 - 1.05) | 0.96 (0.86-1.07) |
| **Women's occupation** |  |  |
| Not working | Ref | Ref |
| Working | 1.5 (0.66 - 3.39) | 3.44 (0.41 – 28.71) |
| **Women's Education** |  |  |
| Illiterate | Ref | Ref |
| Literate | 1.05 (0.45 – 2.42) | 3.45 (0.4 – 28.85) |
| **Parity** |  |  |
| Multi Parous | Ref | Ref |
| Primary Parous | 0.97 (0.38 – 2.47) | 0.85 (0.165 – 4.44) |

***Article 6 - Right to Healthcare***

|  | **Right to Health Care** | | | |
| --- | --- | --- | --- | --- |
| **Danger sign recall scores** | **Labor signs recall scores** | **Neonatal danger sign recall scores** | **Decision Making** |
| OR (95% CI) | OR (95% CI) | OR (95% CI) | OR (95% CI) |
| **Age** | 1.03 (1.00 - 1.05) | 1.02 (0.99 - 1.04) | 0.99 (0.96 - 1.02) | 1.01 (0.98 - 1.05) |
| **Women's occupation** |  |  |  |  |
| Not working | Ref | Ref | Ref | Ref |
| Working | 0.70 (0.50 - 0.97) | 0.85 (0.64 - 1.11) | 0.88 (0.57 - 1.33) | 1.98 (1.25 - 3.15) |
| **Women's Education** |  |  |  |  |
| Illiterate | Ref | Ref | Ref | Ref |
| Literate | 1.00 (0.71 - 1.40) | 1.10 (0.84 - 1.45) | 1.35 (0.90 - 2.03) | 1.00 (0.66 - 1.52) |
| **Parity** |  |  |  |  |
| Multi Parous | Ref | Ref | Ref | Ref |
| Primary Parous | 0.87 (0.60 - 1.25) | 0.58 (0.43 - 0.78) | 0.94 (0.59 - 1.49) | 0.90 (0.58 - 1.41) |
